# Supplementary material for: Identification and Molecular Mechanisms of Key Nucleotides Causing Attenuation in Pathogenicity of Dahlia Isolate of Potato Spindle Tuber Viroid
Source: PubMed Central journal article supplement (PMC7583970; doi:10.3390/ijms21197352), 2020-10-05
Supplement: ijms-21-07352-s001.pdf [file ijms-21-07352-s001.pdf]

**Table S1:** Oligo nucleotide primers used in the present study

| Name                                 | sequence (5'---3')                                     | References |           |
|--------------------------------------|--------------------------------------------------------|------------|-----------|
| PSTVd-231F<br>PSTVd-296R             | GCCCCCTTTGCGCTGT<br>AAGCGGTTCTCGGGAGCTT                | [1]        |           |
| SIEXPA2-F<br>SIEXPA2-R               | TTGCACCCGCTTAGGCCTATTAGT<br>ACCCTCAAATCCATAAATGGCCGC   | [2]        |           |
| SIEXPA5-F<br>SIEXPA5-R               | GGCAGAATAACGCTTACCTTAACGGC<br>GACCAAGAAGTACCTTAACGGC   |            |           |
| SIEXPA9-F<br>SIEXPA9-R               | CCCATCACACTGGCAATTTGGTCA<br>TCAGCTCTTCTACATGCACCACCA   |            |           |
| SIEXPA11-F<br>SIEXPA11-R             | ATTTATACGTGTGATAGGCAGCGGCG<br>TGTTTCCAGCACCTTCGGACTAGA |            |           |
| SIEXPA14-F<br>SIEXPA14-R             | AGCTGGCATTGTCCCTGTCATCTA<br>TCTCCTGCACCTCCAACGTTTGT    |            |           |
| SIEXPA18-F<br>SIEXPA18-R             | TGGGAAGGGATGAAGCGTAGATGA<br>AGTCCTAATAGAAGCTGCGGGCTA   |            |           |
| tchs2-1152P<br>tchs2-1255M           | CTCATCCAAAGAAGGGCTTAGTACC<br>CACTATGGAGCACAACAGTCTCAAC |            | This work |
| $\beta$ -actin F<br>$\beta$ -actin R | GAGGACAGGATGCTCCTCAG<br>AGACGCCTATGTGGGAGATG           |            | [3]       |
| PSTV-88M<br>PSTVd-89P                | CCCTGAAGCGCTCCTCCGAG<br>ATCCCCGGGGAAACCTGGAGCGAAC      | [4]        |           |

**Reference:**

- Adkar-Purushothama, C.R.; Brosseau, C.; Giguère, T.; Sano, T.; Moffett, P.; Perreault, J.-P. Small RNA Derived from the Virulence Modulating Region of the Potato spindle tuber viroid Silences callose synthase Genes of Tomato Plants. *Plant Cell* **2015**, *27*, 2178–2194, doi:10.1105/tpc.15.00523.
- Lu, Y.; Liu, L.; Wang, X.; Han, Z.; Ouyang, B.; Zhang, J.; Li, H. Genome-wide identification and expression analysis of the expansin gene family in tomato. *Mol. Genet. Genomics* **2016**, doi:10.1007/s00438-015-1133-4.
- Wu, W.; Ding, Y.; Wei, W.; Davis, R.E.; Lee, I.-M.; Hammond, R.W.; Zhao, Y. Salicylic acid-mediated elicitation of tomato defence against infection by potato purple top phytoplasma. *Ann. Appl. Biol.* **2012**, *161*, 36–45, doi:10.1111/j.1744-7348.2012.00550.x.
- Tsushima, D.; Tsushima, T.; Sano, T. Molecular dissection of a dahlia isolate of potato spindle tuber viroid inciting a mild symptoms in tomato. *Virus Res.* **2016**, *214*, 11–18, doi:10.1016/j.virusres.2015.12.018.

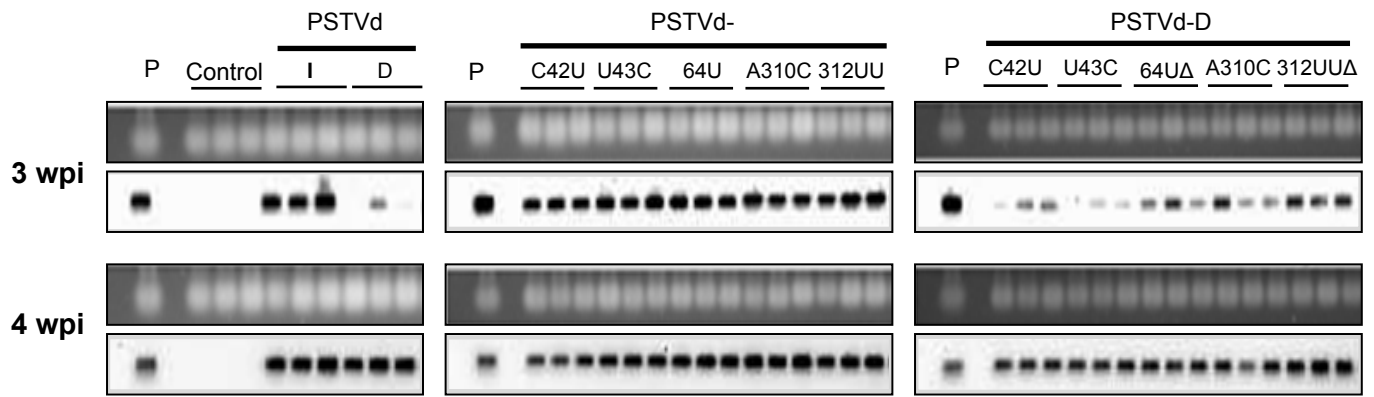

**Figure S1: Northern blot hybridization to evaluate the accumulation of native PSTVd mutants.**

Total RNA extracted from tomato plants inoculated with native PSTVd mutants were analyzed by Northern blot assay using DIG-labelled PSTVd specific probes at 3-, and 4-wpi. In the figure, P denotes, positive control; control, mock-inoculated plants.

**Figure S1 (Kitabayashi et al.,)**

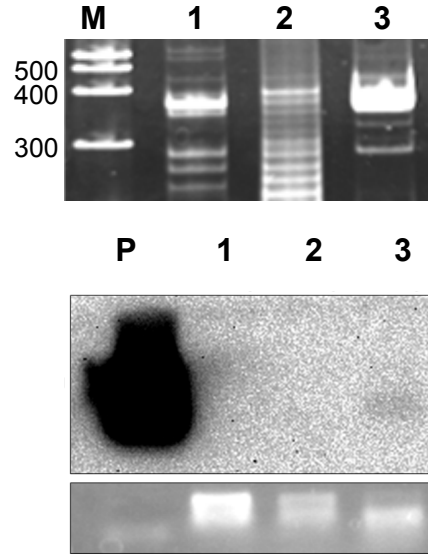

**Figure S2: (A) RT-PCR, and (B) Northern blot hybridization analysis for the accumulation of PSTVd-I:C42U/64U in tomato plants.**

In the figure, M denotes 100-bp ladder; P indicates positive control.

**Figure S2 (Kitabayashi et al.,)**

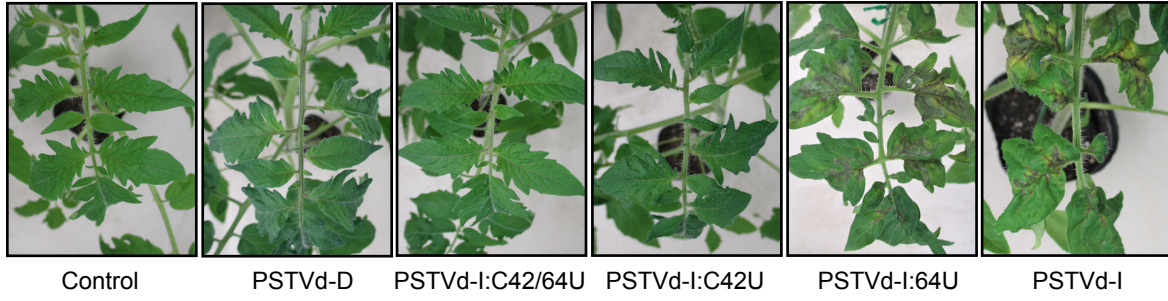

**Figure S3: Tomato plants inoculated with PSTVd-I and PSTVd-I:64U exhibited severe vein necrosis on the middle of leaves at 5 wpi.**

**Figure S3 (Kitabayashi et al.,)**

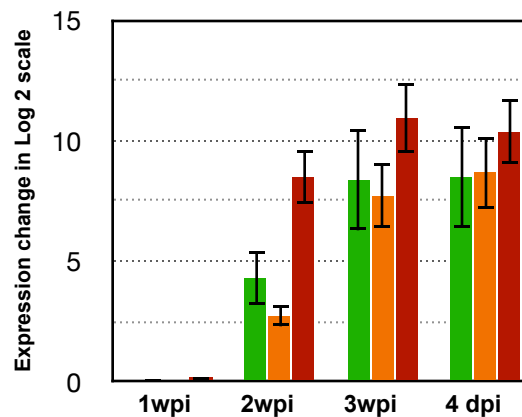

**Figure S4: RT-qPCR analysis for the accumulation of PSTVd-D<sub>wt</sub>, PSTVd-I:C42U, and PSTVd-I<sub>wt</sub>.**

Total RNA extracted from tomato plants inoculated with LMW-RNA of PSTVd-D<sub>wt</sub>, PSTVd-I<sub>wt</sub> and PSTVd-I:C42U were assayed by RT-qPCR to analyze the accumulation of viroid RNA. The expression of the viroid RNA is presented in a log<sub>2</sub> scale. In the figure, the green bar represents the PSTVd-D<sub>wt</sub> inoculated plants, while, the orange and the red bars indicate the PSTVd-I:C42U and PSTVd-I<sub>wt</sub> inoculated plants, respectively. Data represent the mean of three independent experiments, each performed in triplicate. Error bars indicate SD.

**Figure S4 (Kitabayashi et al.,)**

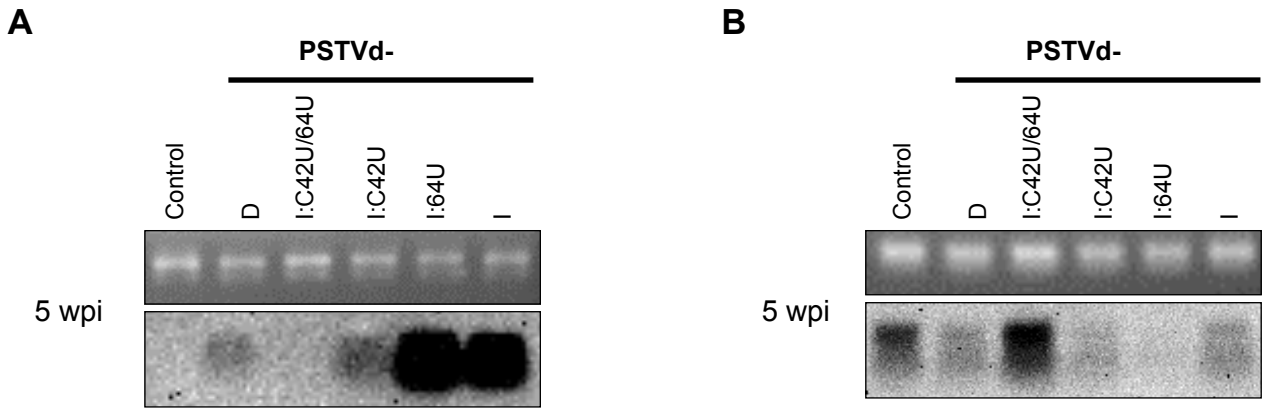

**Figure S5: Northern gel blot assay for the accumulation of (A) *sIPR1b1*, and (B) *TCHS2* mRNA**

Total RNA extracted from tomato plants inoculated with LMW-RNA of PSTVd-D<sub>wt</sub>, PSTVd-I<sub>wt</sub>, and mutants of PSTVd-I (PSTVd-I:C42U/64U, PSTVd-I:C42U, and PSTVd-I:64U) at 5-wpi were assayed by Northern gel blot to analyze the expression level of (A) *PR1b1* and (B) *TCHS2* mRNAs.

**Figure S5 (Kitabayashi et al.,)**

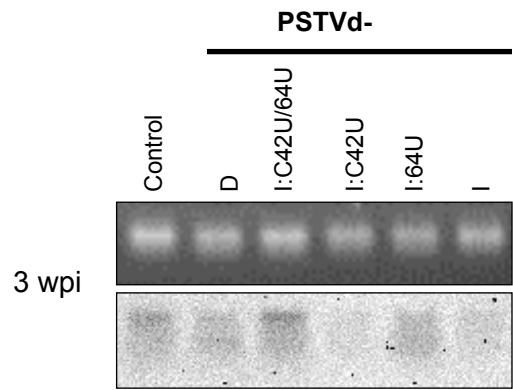

**Figure S6: Northern gel blot assay for the accumulation of *EXPA2* mRNA.**

Total RNA extracted from tomato plants inoculated with LMW-RNA of PSTVd- $D_{wt}$ , PSTVd- $I_{wt}$  and mutants of PSTVd-I (PSTVd-I:C42U/64U, PSTVd-I:C42U, and PSTVd-I:64U) at 5-wpi were assayed by Northern gel blot to analyze the expression level of *EXPA2* mRNA.

**Figure S6 (Kitabayashi et al.,)**
